# Supplementary material for: Ruthenium(ii) arene complexes containing benzhydrazone ligands: synthesis, structure and antiproliferative activity
Source: Royal Society of Chemistry journal article supplement (doi:10.1039/c6qi00197a), 2016-01-01
Supplement: c6qi00197a1.pdf [file c6qi00197a1.pdf]

## **Ruthenium(II) Arene Complexes Containing Benzhydrazones Ligands: Synthesis, Structure and Antiproliferative Activity**

Mohamed Kasim Mohamed Subarkhan<sup>†</sup> and Rengan Ramesh,<sup>\*,†</sup>

<sup>†</sup>School of Chemistry, Bharathidasan University, Tiruchirappalli 620 024, Tamil Nadu, India.

| Table of the content                                                                                   | Page No.           |
|--------------------------------------------------------------------------------------------------------|--------------------|
| Figure S1 - <sup>1</sup> H NMR spectrum of the complexes <b>1-6</b> in CDCl <sub>3</sub> solution..... | <b>S 4 – S 9</b>   |
| Figure S2 - ESI-MS spectrum of the complexes <b>1-6</b> in acetonitrile solution.....                  | <b>S 10 – S 15</b> |

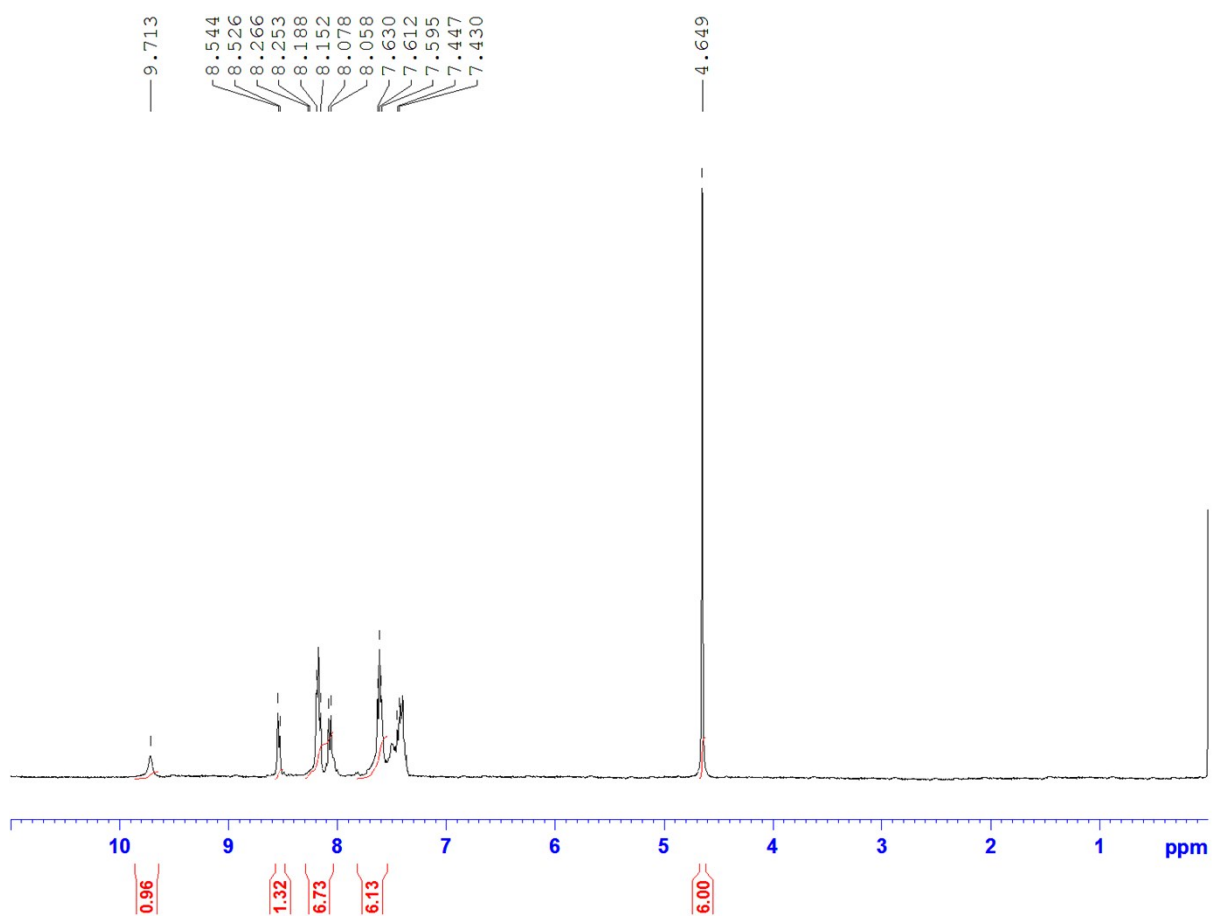

**Figure S1.**  $^1\text{H}$  NMR spectrum of  $[\text{Ru}(\eta^6\text{-C}_6\text{H}_6)(\text{Cl})(\text{L1})]$  (**1**)

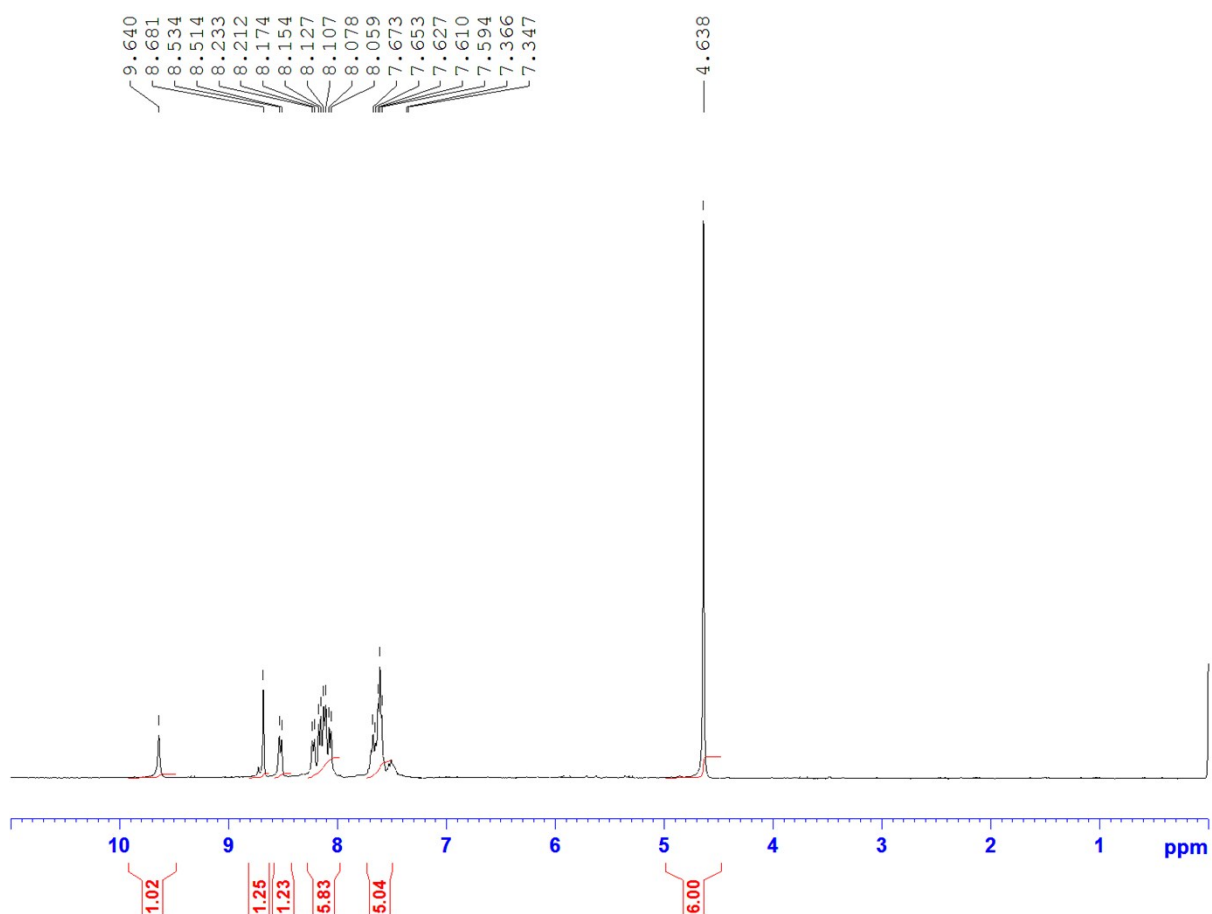

**Figure S2.** <sup>1</sup>H NMR spectrum of [Ru(η<sup>6</sup>-C<sub>6</sub>H<sub>6</sub>)(Cl)(L<sub>2</sub>)] (2)

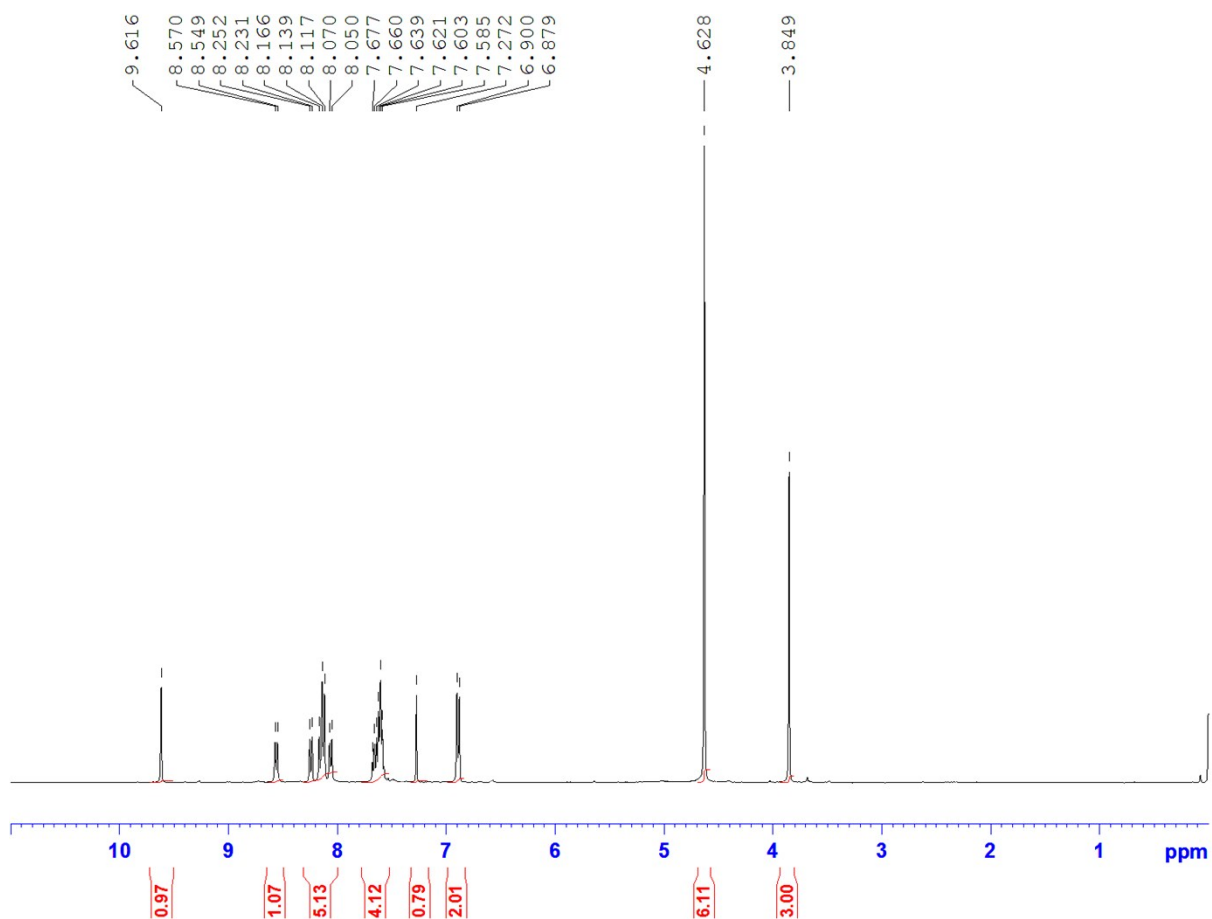

**Figure S3.** <sup>1</sup>H NMR spectrum of [Ru(η<sup>6</sup>-C<sub>6</sub>H<sub>6</sub>)(Cl)(L3)] (3)

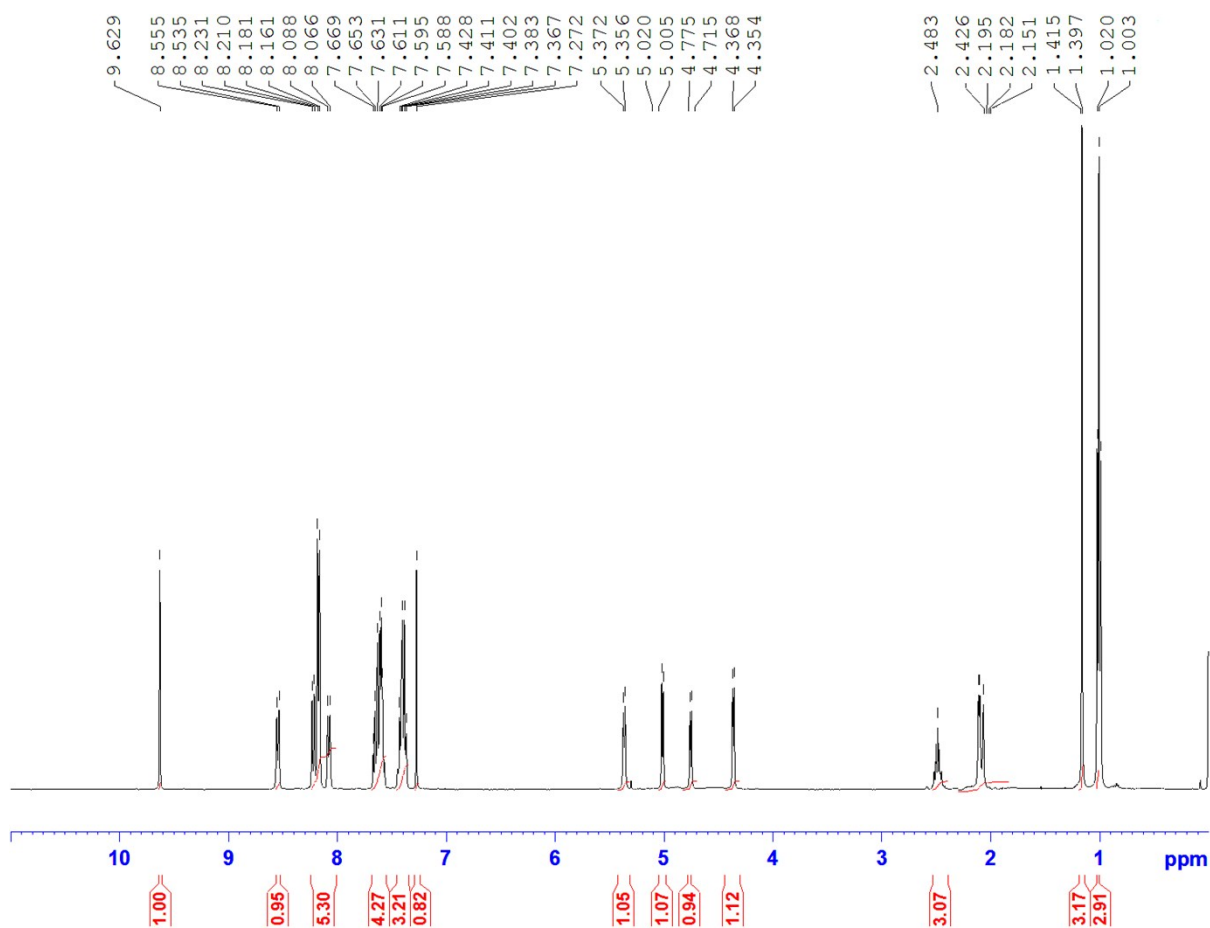

**Figure S4.**  $^1\text{H}$  NMR spectrum of  $[\text{Ru}(\eta^6\text{-p-cymene})(\text{Cl})(\text{L1})]$  (**4**)

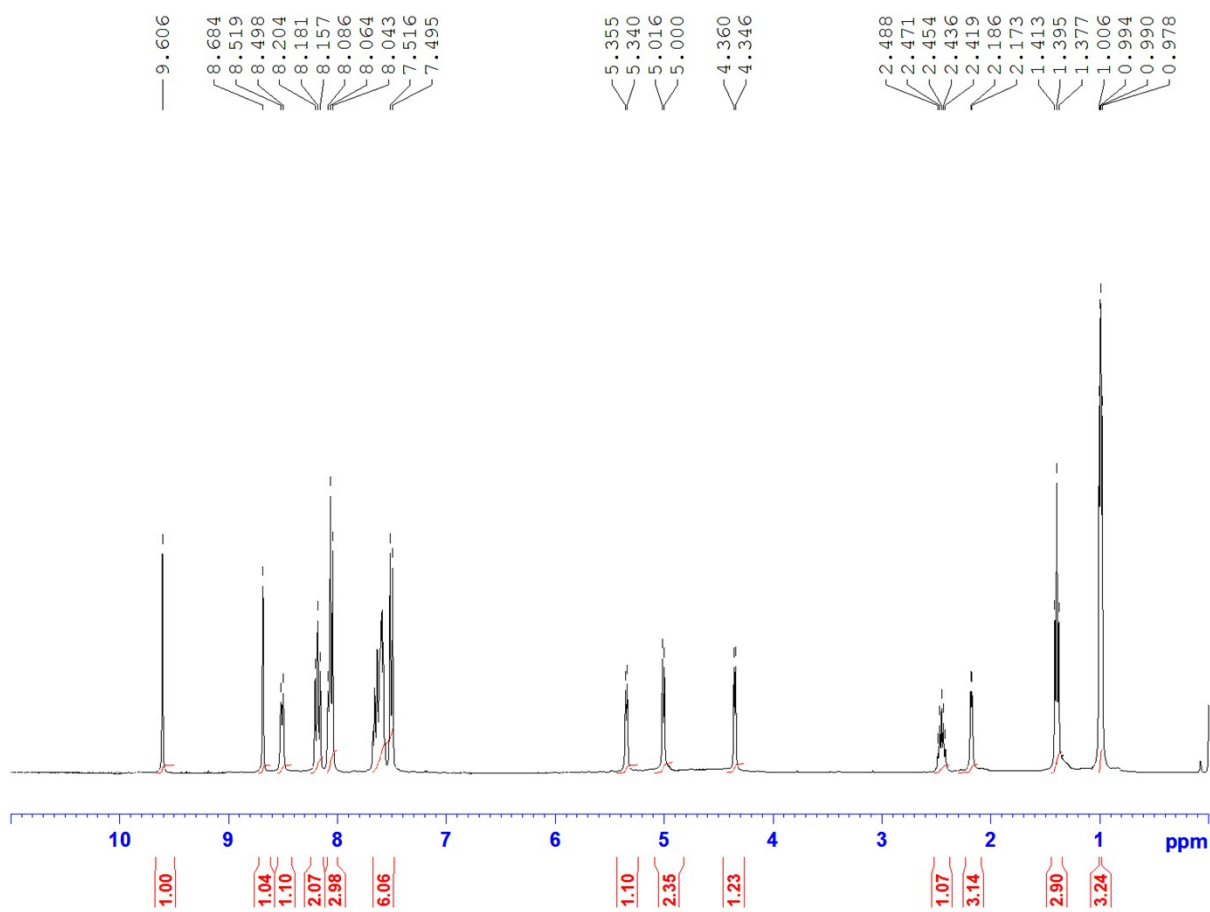

**Figure S5.**  $^1\text{H}$  NMR spectrum of  $[\text{Ru}(\eta^6\text{-p-cymene})(\text{Cl})(\text{L2})]$  (**5**)

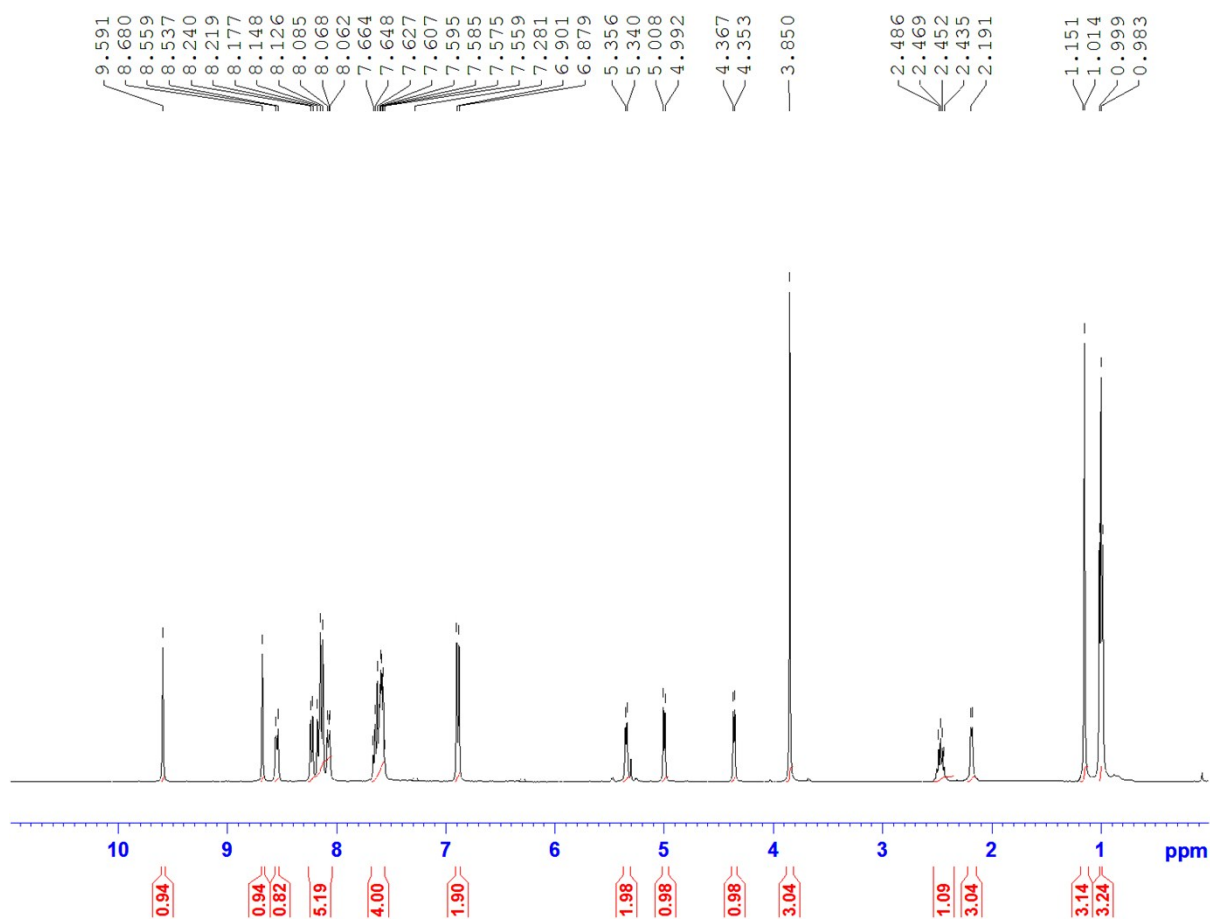

**Figure S6.**  $^1\text{H}$  NMR spectrum of  $[\text{Ru}(\eta^6\text{-p-cymene})(\text{Cl})(\text{L3})]$  (6)

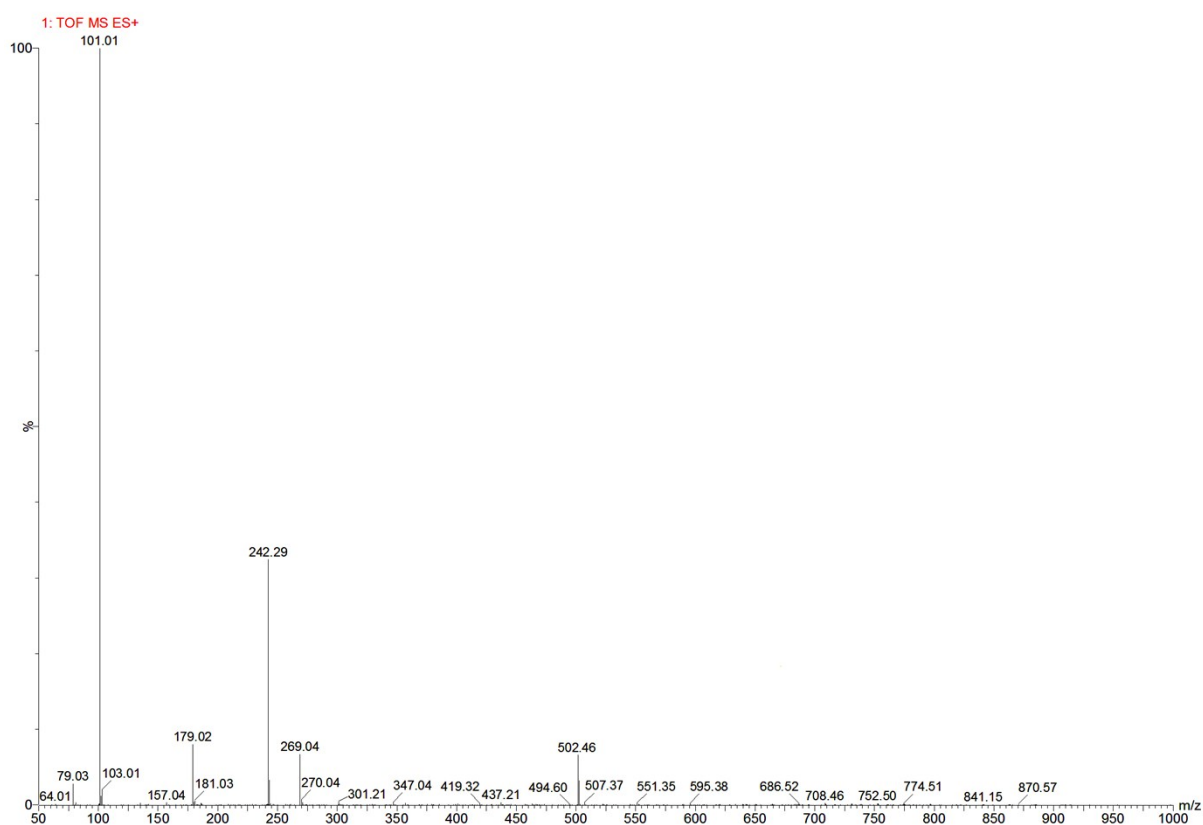

**Figure S7:** ESI-Mass spectrum of  $[\text{Ru}(\eta^6\text{-C}_6\text{H}_6)(\text{Cl})(\text{L1})]$  (**1**)



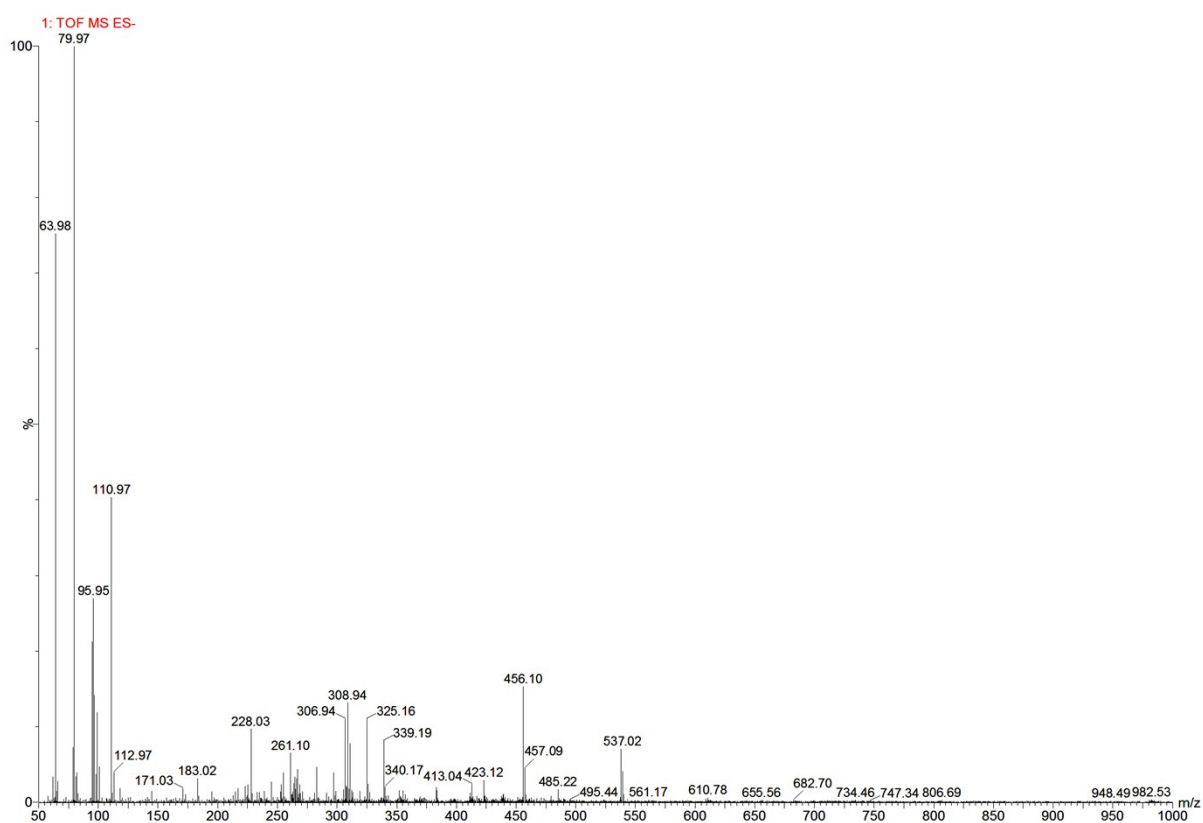

**Figure S8:** ESI-Mass spectrum of  $[\text{Ru}(\eta^6\text{-C}_6\text{H}_6)(\text{Cl})(\text{L2})]$  (**2**)

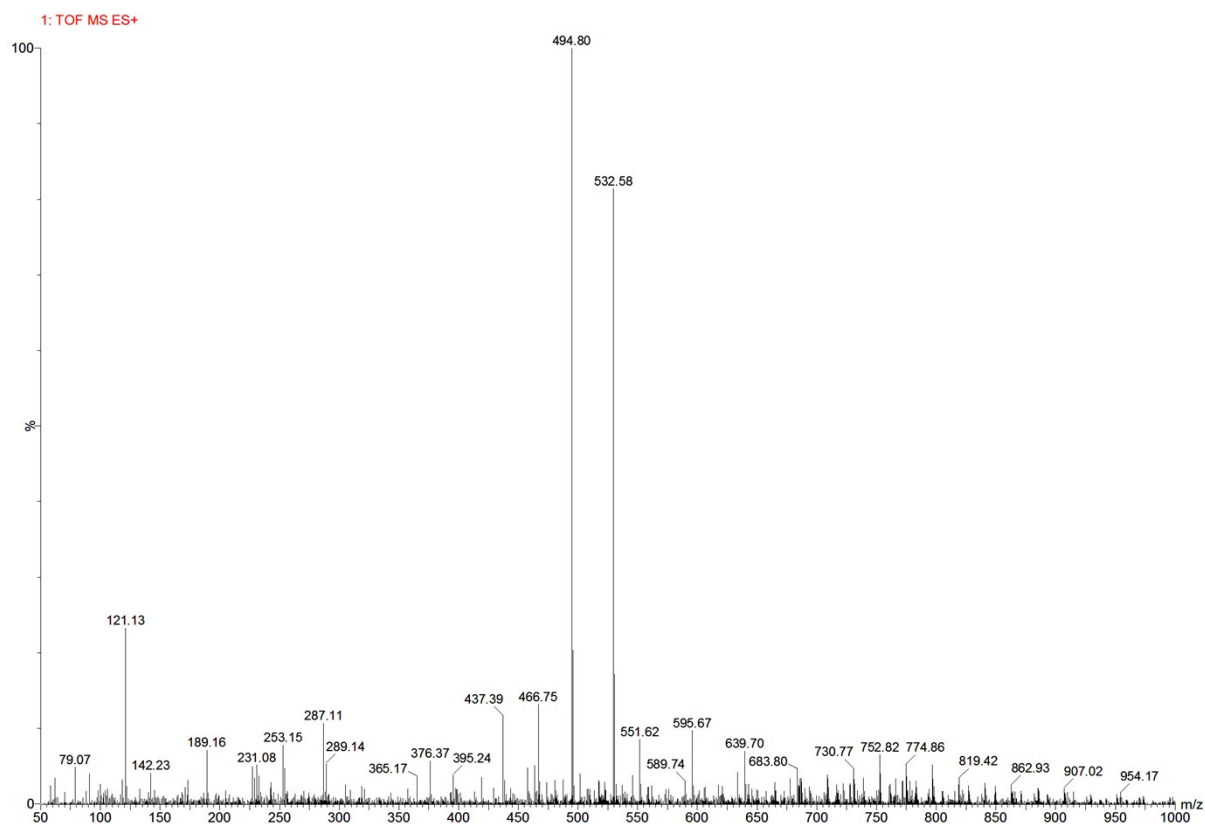

**Figure S9:** ESI-Mass spectrum of  $[\text{Ru}(\eta^6\text{-C}_6\text{H}_6)(\text{Cl})(\text{L3})]$  (**3**)

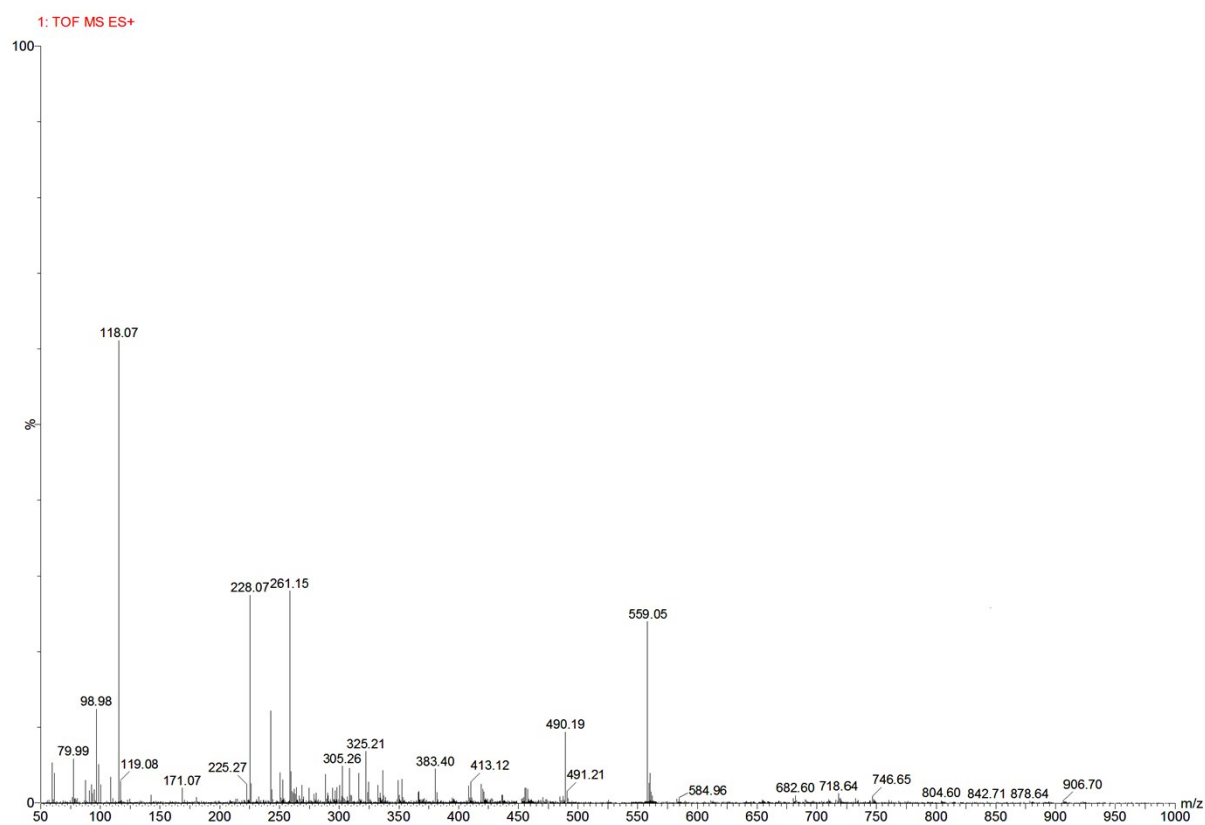

**Figure S10:** ESI-Mass spectrum of  $[\text{Ru}(\eta^6\text{-p-cymene})(\text{Cl})(\text{L1})]$  (**4**)

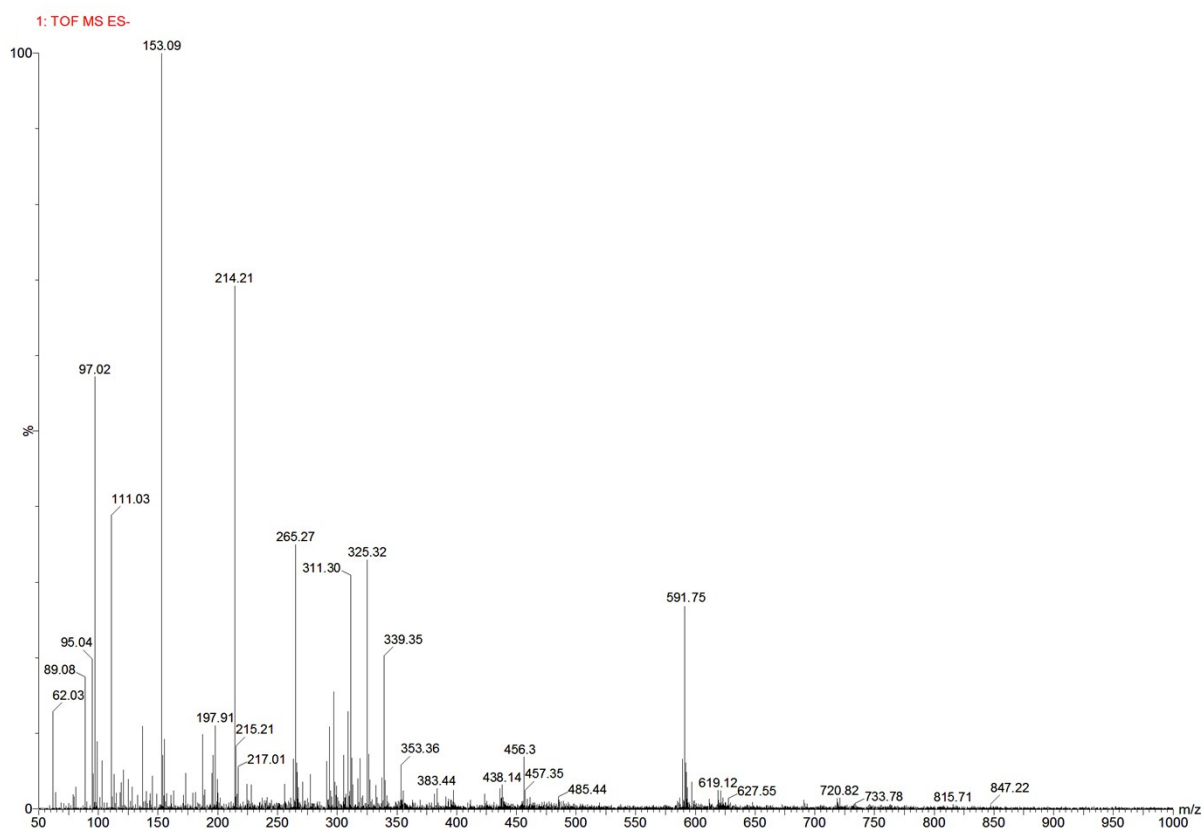

**Figure S11:** ESI-Mass spectrum of  $[\text{Ru}(\eta^6\text{-p-cymene})(\text{Cl})(\text{L2})]$  (**5**)

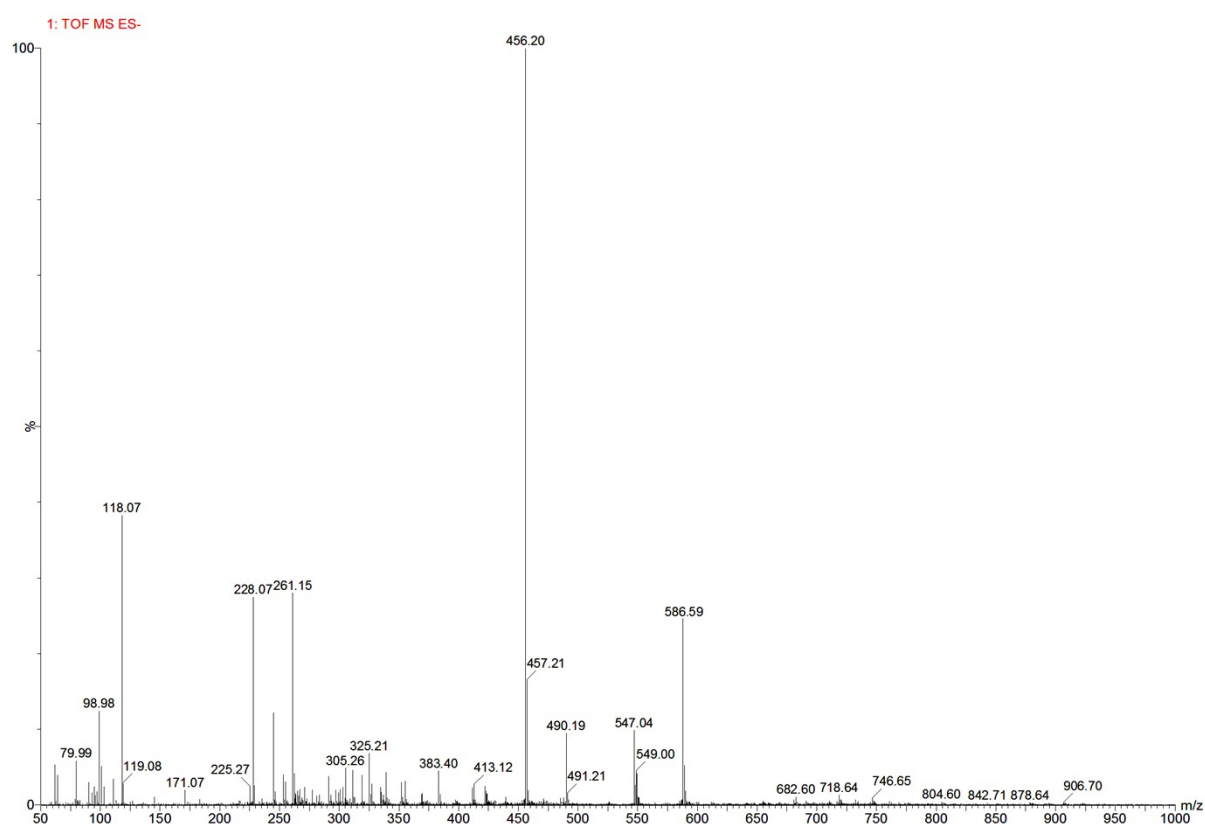

**Figure S12:** ESI-Mass spectrum of  $[\text{Ru}(\eta^6\text{-p-cymene})(\text{Cl})(\text{L3})]$  (**6**)
